# Supplementary material
Source: HighWire-hosted journal article supplement (https://gut.bmj.com/content/68/10/1820)
Supplement: inline-supplementary-material-1 [file inline-supplementary-material-1.pdf]

Supplementary file belonging to:

## **Increasing incidence of colorectal cancer in young adults in Europe over the last 25 years**

Fanny E.R. Vuik<sup>1</sup>; Stella A.V. Nieuwenburg<sup>1</sup>; Marc Bardou<sup>2,3</sup>; Iris Lansdorp-Vogelaar<sup>2</sup>; Mário Dinis-Ribeiro<sup>4,5</sup>; Maria J. Bento<sup>6</sup>; Vesna Zadnik<sup>7</sup>; Maria Pellisé<sup>8</sup>; Laura Esteban<sup>9</sup>; Michal Kaminski<sup>10,11,12</sup>; Stepan Suchanek<sup>13</sup>; Ondřej Ngo<sup>14,15</sup>; Ondřej Májek<sup>14,15</sup>; Marcis Leja<sup>16</sup>; Ernst J. Kuipers<sup>1</sup>; Manon C.W. Spaander<sup>1</sup>

| Country                | Incidence                                                                                                                                                          | Mortality                                                                                                                                                          | Population                                                                                                 | Microscopically verified (MV) (%)* | DCO (death certificate only) rate (%)* | Level of completeness <sup>o</sup> | National coverage <sup>o</sup>  |
|------------------------|--------------------------------------------------------------------------------------------------------------------------------------------------------------------|--------------------------------------------------------------------------------------------------------------------------------------------------------------------|------------------------------------------------------------------------------------------------------------|------------------------------------|----------------------------------------|------------------------------------|---------------------------------|
| <b>The Netherlands</b> | The Netherlands Cancer Registry, IKNL, 2018.<br><a href="https://www.cijfersoverkanker.nl">https://www.cijfersoverkanker.nl</a>                                    | The Netherlands Cancer Registry, IKNL, 2018.<br><a href="https://www.cijfersoverkanker.nl">https://www.cijfersoverkanker.nl</a>                                    | United states CENSUS bureau<br><a href="https://www.census.gov/en.html">https://www.census.gov/en.html</a> | 97.3                               | -                                      | 100%                               | All data available from 1989    |
| <b>Germany</b>         | The German Centre for Cancer Registry Data (ZfKD)<br><a href="http://www.krebsdaten.de/database">www.krebsdaten.de/database</a>                                    | The Federal Statistical Office Germany                                                                                                                             | United states CENSUS bureau<br><a href="https://www.census.gov/en.html">https://www.census.gov/en.html</a> | 85.6                               | 13                                     | 90%                                | All data available from 1999    |
| <b>Belgium</b>         | The Belgium cancer registry<br><a href="http://www.kankerregister.org/Home_en">http://www.kankerregister.org/Home_en</a>                                           | NA                                                                                                                                                                 | United states CENSUS bureau<br><a href="https://www.census.gov/en.html">https://www.census.gov/en.html</a> | 99.0                               | -                                      | -                                  | 95%                             |
| <b>Ireland</b>         | National cancer registry Ireland<br><a href="https://www.ncri.ie">https://www.ncri.ie</a>                                                                          | NA                                                                                                                                                                 | United states CENSUS bureau<br><a href="https://www.census.gov/en.html">https://www.census.gov/en.html</a> | 93.5                               | 1.0                                    | 98.2                               | All data available from 1994    |
| <b>Italy</b>           | AIRTUM ITACAN: Cancer in Italy, Version 2.0. Italian Association of Cancer Registries<br><a href="http://www.registri-tumori.it">http://www.registri-tumori.it</a> | AIRTUM ITACAN: Cancer in Italy, Version 2.0. Italian Association of Cancer Registries<br><a href="http://www.registri-tumori.it">http://www.registri-tumori.it</a> | United states CENSUS bureau<br><a href="https://www.census.gov/en.html">https://www.census.gov/en.html</a> | 87.9                               | 2.5                                    | -                                  | 70% of data available from 2006 |
| <b>Denmark</b>         | Association of the Nordic Cancer Registries. Danish Cancer Society.                                                                                                | Association of the Nordic Cancer Registries. Danish Cancer Society.                                                                                                | United states CENSUS bureau<br><a href="https://www.census.gov/en.html">https://www.census.gov/en.html</a> | 95.7                               | 0.3                                    | 100%                               | -                               |

|                |                                                                                                                                                                                            |                                                                                                                                                                                            |                                                                                                                |       |      |      |                              |
|----------------|--------------------------------------------------------------------------------------------------------------------------------------------------------------------------------------------|--------------------------------------------------------------------------------------------------------------------------------------------------------------------------------------------|----------------------------------------------------------------------------------------------------------------|-------|------|------|------------------------------|
|                | <a href="http://www-dep.iarc.fr/NORDCAN/english/frame.asp">http://www-dep.iarc.fr/NORDCAN/english/frame.asp</a>                                                                            | <a href="http://www-dep.iarc.fr/NORDCAN/english/frame.asp">http://www-dep.iarc.fr/NORDCAN/english/frame.asp</a>                                                                            |                                                                                                                |       |      |      |                              |
| <b>Sweden</b>  | Association of the Nordic Cancer Registries. Danish Cancer Society.<br><br><a href="http://www-dep.iarc.fr/NORDCAN/english/frame.asp">http://www-dep.iarc.fr/NORDCAN/english/frame.asp</a> | Association of the Nordic Cancer Registries. Danish Cancer Society.<br><br><a href="http://www-dep.iarc.fr/NORDCAN/english/frame.asp">http://www-dep.iarc.fr/NORDCAN/english/frame.asp</a> | United states CENSUS bureau<br><br><a href="https://www.census.gov/en.html">https://www.census.gov/en.html</a> | -     | -    | 100% | All data available from 1960 |
| <b>Norway</b>  | Association of the Nordic Cancer Registries. Danish Cancer Society.<br><br><a href="http://www-dep.iarc.fr/NORDCAN/english/frame.asp">http://www-dep.iarc.fr/NORDCAN/english/frame.asp</a> | Association of the Nordic Cancer Registries. Danish Cancer Society.<br><br><a href="http://www-dep.iarc.fr/NORDCAN/english/frame.asp">http://www-dep.iarc.fr/NORDCAN/english/frame.asp</a> | United states CENSUS bureau<br><br><a href="https://www.census.gov/en.html">https://www.census.gov/en.html</a> | 94.6  | 0.8  | 100% | All data available from 1953 |
| <b>Finland</b> | Association of the Nordic Cancer Registries. Danish Cancer Society.<br><br><a href="http://www-dep.iarc.fr/NORDCAN/english/frame.asp">http://www-dep.iarc.fr/NORDCAN/english/frame.asp</a> | Association of the Nordic Cancer Registries. Danish Cancer Society.<br><br><a href="http://www-dep.iarc.fr/NORDCAN/english/frame.asp">http://www-dep.iarc.fr/NORDCAN/english/frame.asp</a> | United states CENSUS bureau<br><br><a href="https://www.census.gov/en.html">https://www.census.gov/en.html</a> | -     | -    | 100% | All data available from 1953 |
| <b>Iceland</b> | Association of the Nordic Cancer Registries. Danish Cancer Society.<br><br><a href="http://www-dep.iarc.fr/NORDCAN/english/frame.asp">http://www-dep.iarc.fr/NORDCAN/english/frame.asp</a> | Association of the Nordic Cancer Registries. Danish Cancer Society.<br><br><a href="http://www-dep.iarc.fr/NORDCAN/english/frame.asp">http://www-dep.iarc.fr/NORDCAN/english/frame.asp</a> | United states CENSUS bureau<br><br><a href="https://www.census.gov/en.html">https://www.census.gov/en.html</a> | >97.9 | <0.3 | 100% | All data available from 1955 |

|                    |                                                                                                                                                                                                                                           |                                                                                                                                                                                                                                           |                                                                                                                       |       |     |      |                                                                                                                                                                                                                   |
|--------------------|-------------------------------------------------------------------------------------------------------------------------------------------------------------------------------------------------------------------------------------------|-------------------------------------------------------------------------------------------------------------------------------------------------------------------------------------------------------------------------------------------|-----------------------------------------------------------------------------------------------------------------------|-------|-----|------|-------------------------------------------------------------------------------------------------------------------------------------------------------------------------------------------------------------------|
| <b>Greenland</b>   | <p>Association of the Nordic Cancer Registries. Danish Cancer Society.</p> <p><a href="http://www-dep.iarc.fr/NORDCAN/english/frame.asp">http://www-dep.iarc.fr/NORDCAN/english/frame.asp</a></p>                                         | <p>Association of the Nordic Cancer Registries. Danish Cancer Society.</p> <p><a href="http://www-dep.iarc.fr/NORDCAN/english/frame.asp">http://www-dep.iarc.fr/NORDCAN/english/frame.asp</a></p>                                         | <p>United states CENSUS bureau</p> <p><a href="https://www.census.gov/en.html">https://www.census.gov/en.html</a></p> | -     | -   | 100% | All data available from 1968                                                                                                                                                                                      |
| <b>Switzerland</b> | <p>The Swiss national dataset managed by the Foundation National Institute for Cancer Epidemiology and Registration (NICER).</p> <p><a href="http://www.nicer.org/en/statistics-atlas/">http://www.nicer.org/en/statistics-atlas/</a></p> | <p>The Swiss national dataset managed by the Foundation National Institute for Cancer Epidemiology and Registration (NICER).</p> <p><a href="http://www.nicer.org/en/statistics-atlas/">http://www.nicer.org/en/statistics-atlas/</a></p> | <p>United states CENSUS bureau</p> <p><a href="https://www.census.gov/en.html">https://www.census.gov/en.html</a></p> | 93.4  | 2.0 |      | <p>1990-1994: 53.5% of data available</p> <p>1995-1999: 56.9% of data available</p> <p>2000-2004: 57.9% of data available</p> <p>2005-2009: 61.8% of data available</p> <p>2010-2014: 74.1% of data available</p> |
| <b>France</b>      | <p>Data from health insurance administrative database:</p> <p>Source Sniiram CNAMTS</p> <p>Source INSEE, estimation of the population as of 1st January, published on 17<sup>th</sup> January 2017.</p>                                   | NA                                                                                                                                                                                                                                        | <p>Source INSEE, estimation of the population as of 1st January, published on 17<sup>th</sup> January 2017</p>        | >93.7 | -   | 100% | All data available from 2007                                                                                                                                                                                      |

|                  |                                                                                                                                                                                                                                                                                                                                                                                                                                                                                                                                                                                                                                                          |                                                                                                                                                                                                                                                                                                                                                                                                                                                                                                                                                                                        |                                                                                                                       |      |      |      |      |
|------------------|----------------------------------------------------------------------------------------------------------------------------------------------------------------------------------------------------------------------------------------------------------------------------------------------------------------------------------------------------------------------------------------------------------------------------------------------------------------------------------------------------------------------------------------------------------------------------------------------------------------------------------------------------------|----------------------------------------------------------------------------------------------------------------------------------------------------------------------------------------------------------------------------------------------------------------------------------------------------------------------------------------------------------------------------------------------------------------------------------------------------------------------------------------------------------------------------------------------------------------------------------------|-----------------------------------------------------------------------------------------------------------------------|------|------|------|------|
| <b>Latvia</b>    | <p>The Centre of Disease Prevention and Control, Republic of Latvia</p> <p>Register for Patients with Particular Diseases, Patients with Cancer.</p>                                                                                                                                                                                                                                                                                                                                                                                                                                                                                                     | Register of Causes of Death                                                                                                                                                                                                                                                                                                                                                                                                                                                                                                                                                            | <p>United states CENSUS bureau</p> <p><a href="https://www.census.gov/en.html">https://www.census.gov/en.html</a></p> | 80.7 | 5.5  | 100% | -    |
| <b>Catalonia</b> | <p>El Càncer a Catalunya. Monografia 2016. Registre de càncer de Catalunya. Pla Director d'Oncologia.<br/><a href="http://cancer.gencat.cat/ca/professionals/estadistiques/">http://cancer.gencat.cat/ca/professionals/estadistiques/</a></p> <p>Registre del Càncer de Girona. Registre del càncer. Institut Català d'Oncologia<br/><a href="http://ico.gencat.cat/ca/professionals/serveis_i_programes/registre_del_cancer/">http://ico.gencat.cat/ca/professionals/serveis_i_programes/registre_del_cancer/</a></p> <p>Registre del Càncer de Tarragona. Funca - registre<br/><a href="https://funca.cat/registre">https://funca.cat/registre</a></p> | <p>El Càncer a Catalunya. Monografia 2016. Registre de càncer de Catalunya. Pla Director d'Oncologia.<br/><a href="http://cancer.gencat.cat/ca/professionals/estadistiques/">http://cancer.gencat.cat/ca/professionals/estadistiques/</a></p> <p>Registre de Mortalitat de Catalunya. Mortalitat. Departament de Salut<br/><a href="http://salutweb.gencat.cat/ca/el_departament/estadistiques_sanitaries/dades_de_salut_i_serveis_sanitaris/mortalitat/">http://salutweb.gencat.cat/ca/el_departament/estadistiques_sanitaries/dades_de_salut_i_serveis_sanitaris/mortalitat/</a></p> | <p>Institut d'Estadística de Catalunya. Idescat<br/><a href="http://www.idescat.cat">www.idescat.cat</a></p>          | 91.7 | 2.2  | 100% | 100% |
| <b>Slovenia</b>  | <p>Cancer Registry of Republic of Slovenia RS Data from: <a href="http://www.slora.si/en">www.slora.si/en</a> and information on: <a href="https://www.onko-i.si/eng/crs/">https://www.onko-i.si/eng/crs/</a></p>                                                                                                                                                                                                                                                                                                                                                                                                                                        | Cancer mortality data are collected by the National Institute of Public Health (NIPH)                                                                                                                                                                                                                                                                                                                                                                                                                                                                                                  | <p>United states CENSUS bureau</p> <p><a href="https://www.census.gov/en.html">https://www.census.gov/en.html</a></p> | 95.2 | <0.5 | 100% | -    |

|                       |                                                                                                                                                                                                                                                                                                                                                                                                   |                                                                                                                                                              |                                                                                                                                                              |       |      |       |      |
|-----------------------|---------------------------------------------------------------------------------------------------------------------------------------------------------------------------------------------------------------------------------------------------------------------------------------------------------------------------------------------------------------------------------------------------|--------------------------------------------------------------------------------------------------------------------------------------------------------------|--------------------------------------------------------------------------------------------------------------------------------------------------------------|-------|------|-------|------|
| <b>Portugal</b>       | Registo Oncológico Regional do Norte                                                                                                                                                                                                                                                                                                                                                              | Registo Oncológico Regional do Norte                                                                                                                         | Registo Oncológico Regional do Norte                                                                                                                         | 98.5% | -    | 100%  | 100% |
| <b>Czech Republic</b> | Czech National Cancer Registry                                                                                                                                                                                                                                                                                                                                                                    | Czech National Cancer Registry and Czech Statistical Office (since 1994)                                                                                     | Czech Statistical Office                                                                                                                                     | 95.7  | 0.4  | 95%   | 100% |
| <b>United Kingdom</b> | Office for national statistics<br><br><a href="https://www.ons.gov.uk/peoplepopulationandcommunity/healthandsocialcare/conditionsanddiseases/datasets/cancerregistrationstatisticscancerregistrationstatisticsengland">https://www.ons.gov.uk/peoplepopulationandcommunity/healthandsocialcare/conditionsanddiseases/datasets/cancerregistrationstatisticscancerregistrationstatisticsengland</a> | NA                                                                                                                                                           | United states CENSUS bureau<br><br><a href="https://www.census.gov/en.html">https://www.census.gov/en.html</a>                                               | 84.6  | 0.1  | 98.4% | -    |
| <b>Poland</b>         | Krajowy Rejestr Nowotworów, Centrum Onkologii - Instytut im. Marii Skłodowskiej - Curie<br><br><a href="http://onkologia.org.pl">http://onkologia.org.pl</a>                                                                                                                                                                                                                                      | Krajowy Rejestr Nowotworów, Centrum Onkologii - Instytut im. Marii Skłodowskiej - Curie<br><br><a href="http://onkologia.org.pl">http://onkologia.org.pl</a> | Krajowy Rejestr Nowotworów, Centrum Onkologii - Instytut im. Marii Skłodowskiej - Curie<br><br><a href="http://onkologia.org.pl">http://onkologia.org.pl</a> | >90.4 | <2.9 | 100%  | -    |

Supplementary table 1: Data source for the age-standardized incidence and mortality rates of colorectal cancer and population data. -: data was not available; \* information retrieved from GLOBOCAN; ° information retrieved from country specific database mentioned in column 2 (Incidence); NA = not applicable.

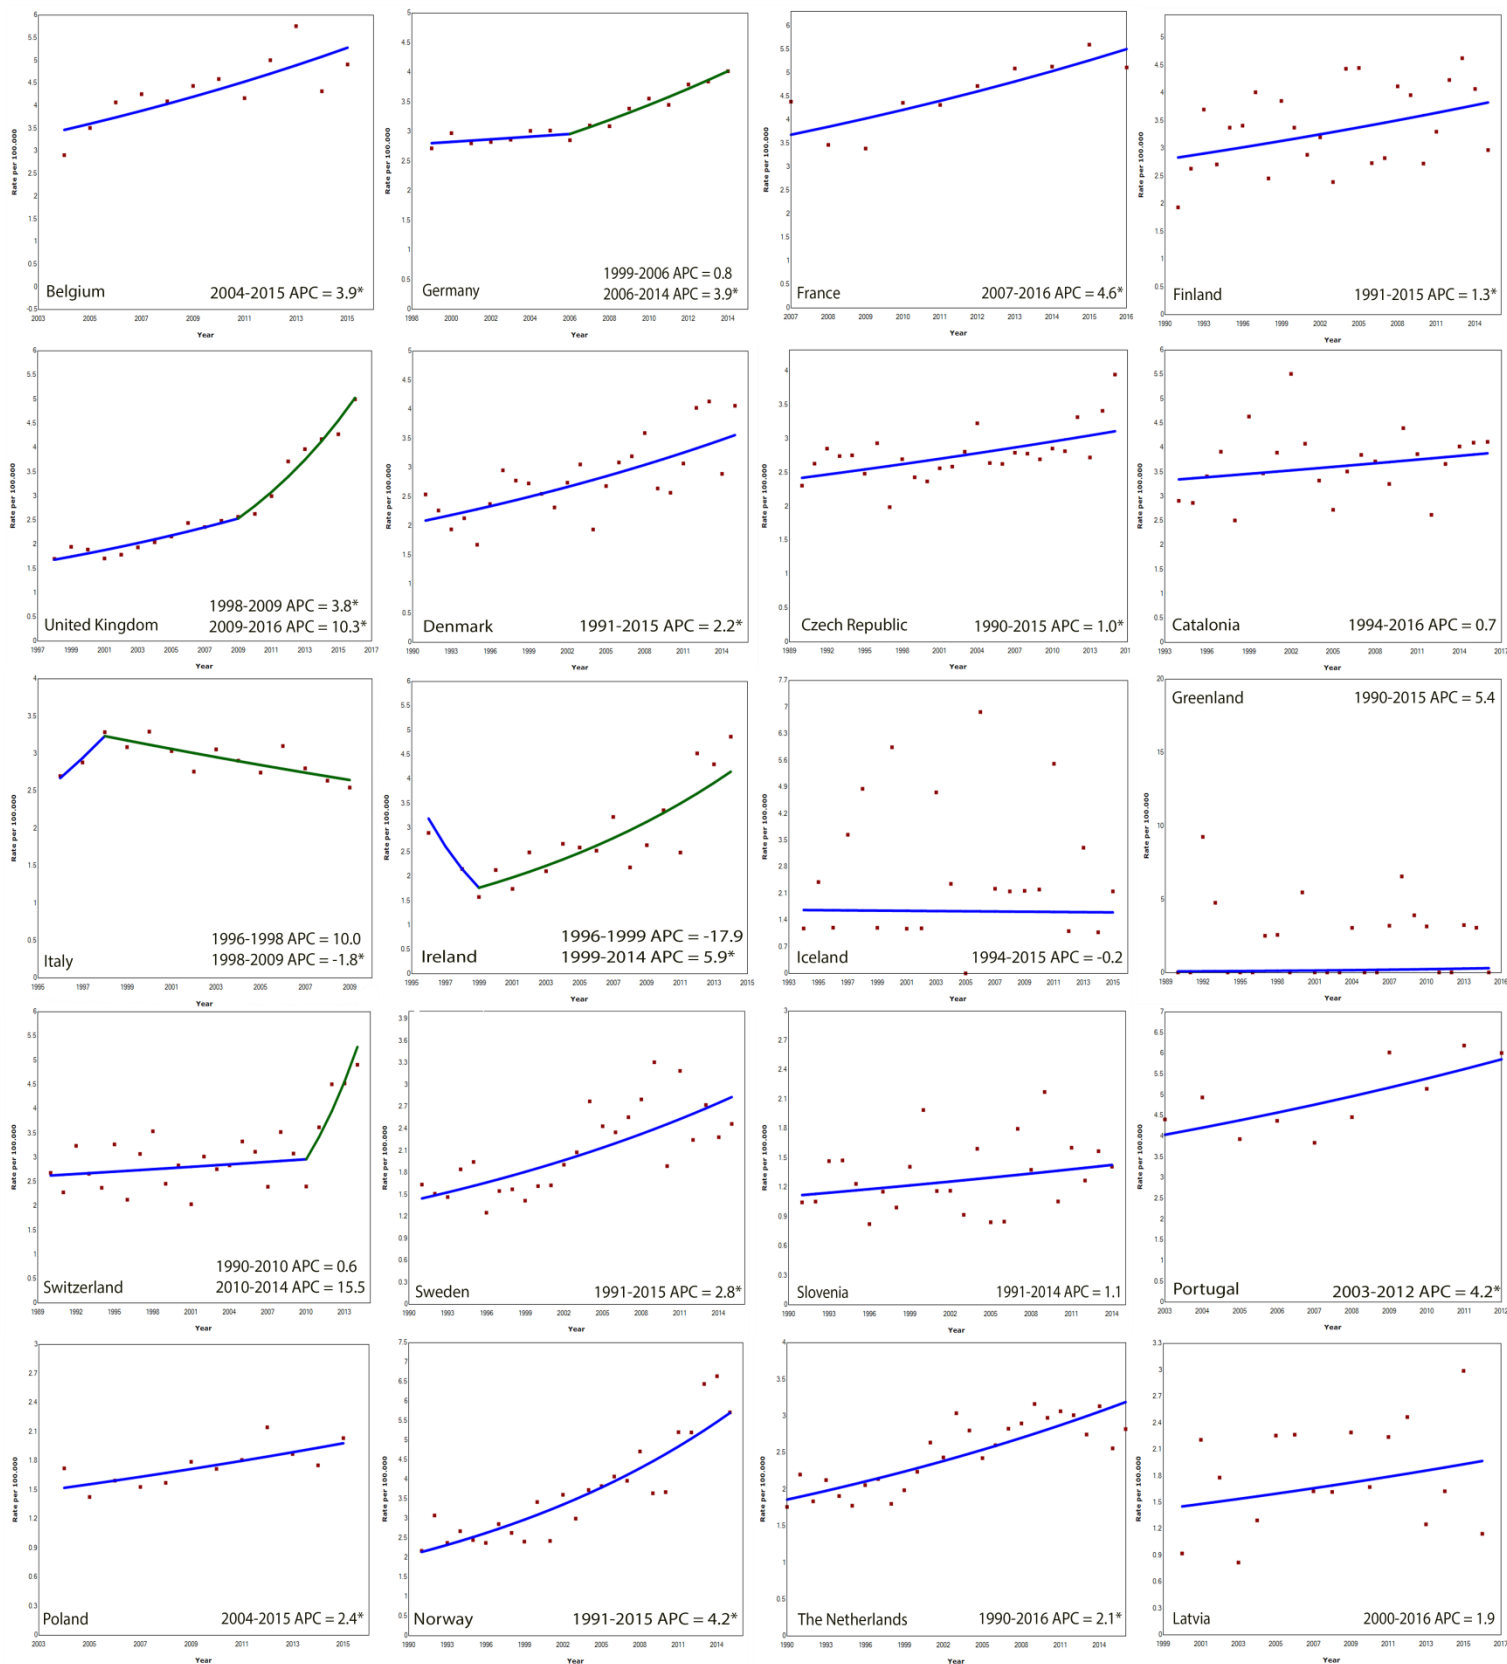

Supplementary figure 1: Incidence annual percent change (APC) per country in age group 20 to 39 year.

\*Statistical significant change in trend.

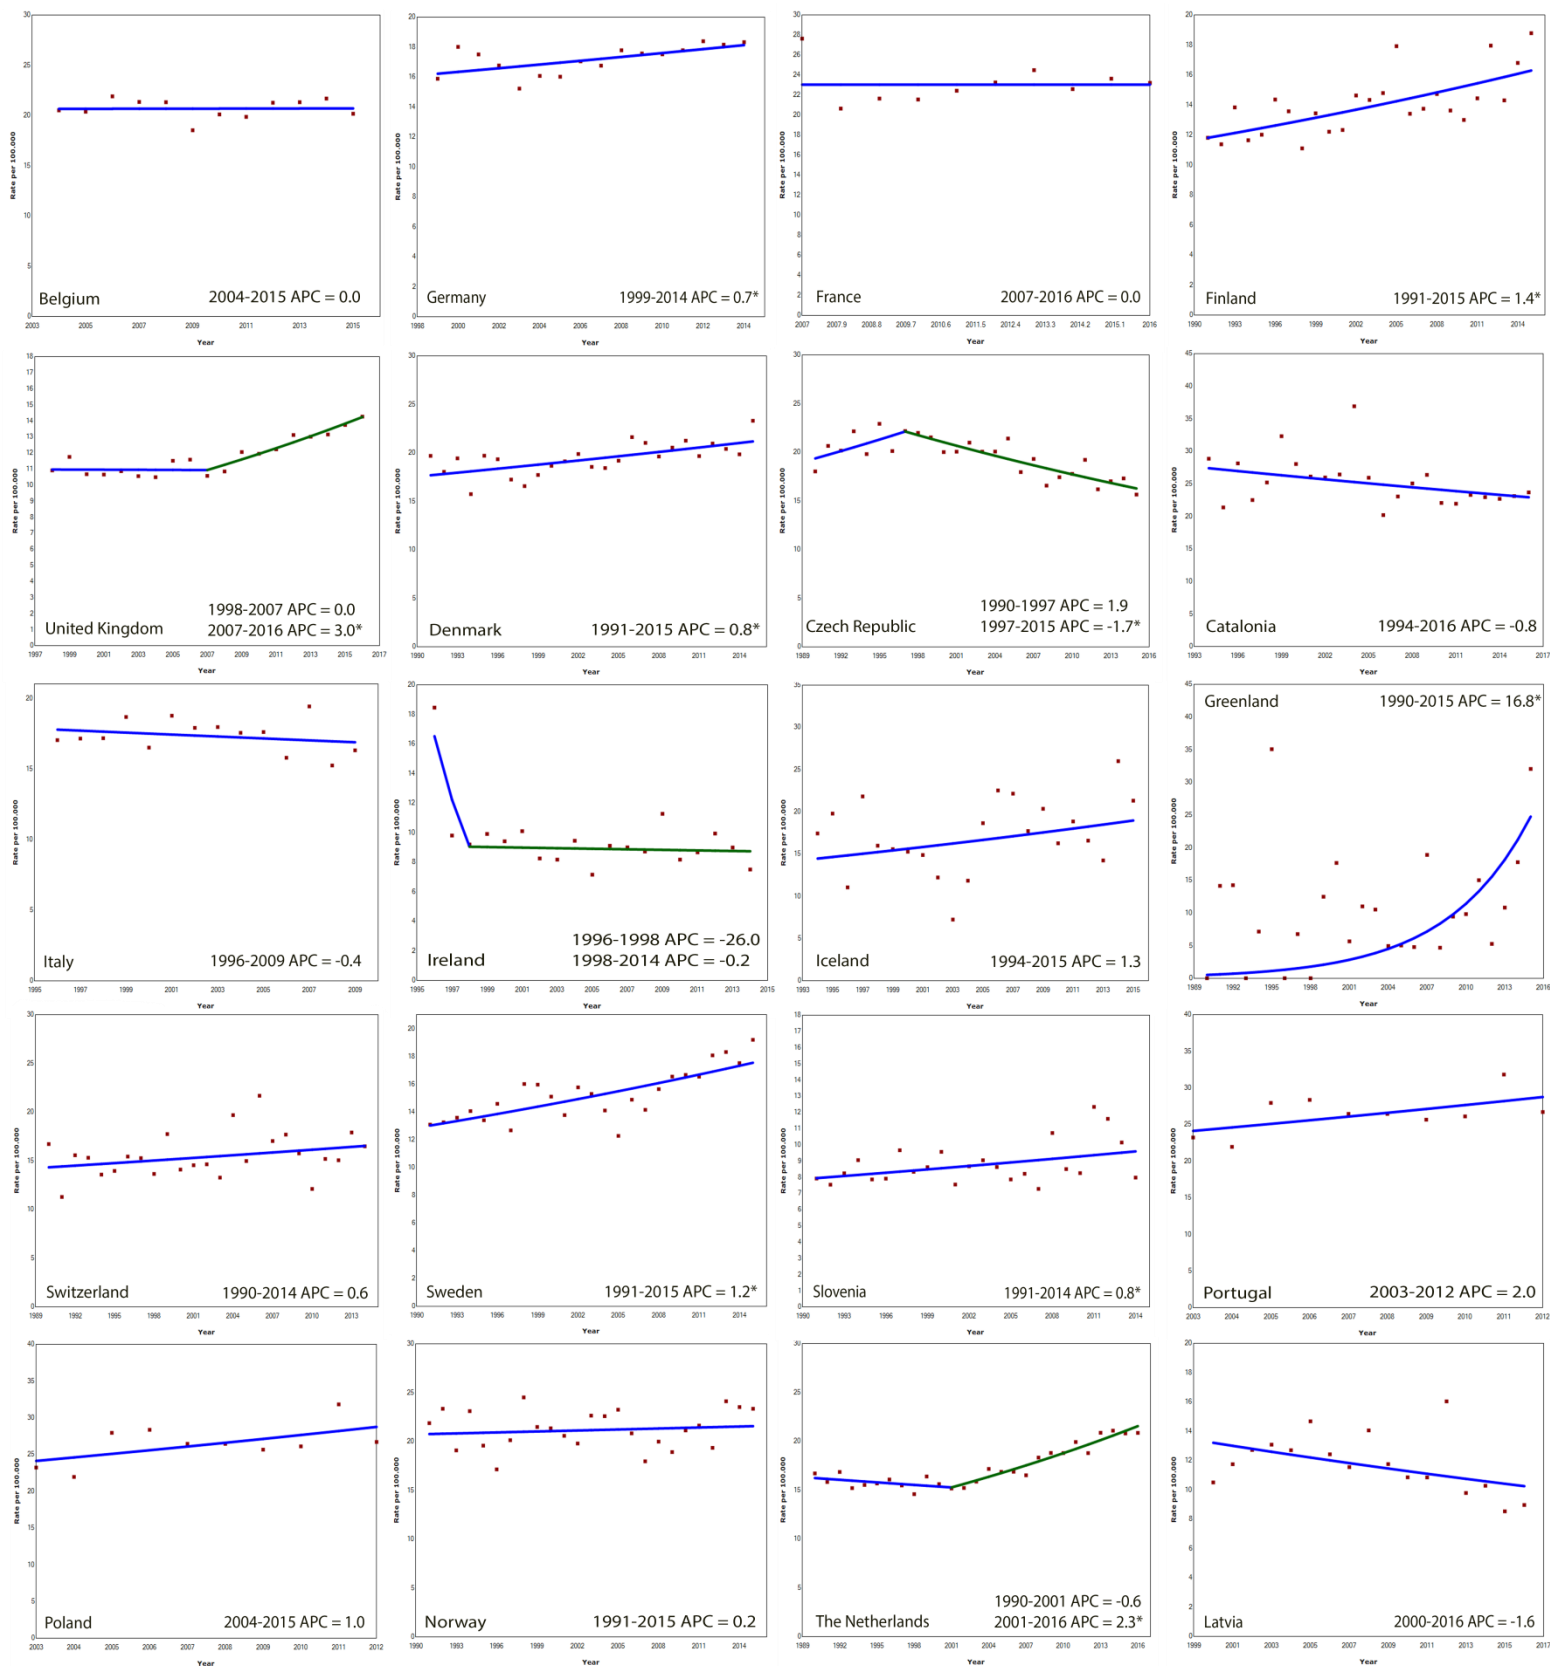

Supplementary figure 2: Incidence annual percent change (APC) per country in age group 40 to 49 year.

\* Statistical significant change in trend.
